# Supplementary material for: Effects of supplemental lighting with different light qualities on growth and secondary metabolite content of Anoectochilus roxburghii
Source: PeerJ. 2018 Jul 19;6:e5274. doi: 10.7717/peerj.5274 (PMC6054866; doi:10.7717/peerj.5274)
Supplement: Supplemental Information 1 [file peerj-06-5274-s001.xls]

## Sheet: Sheet1
							Effects of Supplemental Lighting with Different Light Qualities on Growth and Secondary Metabolite Content of Anoectochilus roxburghii
				RAW DATA
	Morphological indicators
			1	2	3	4	5	6	7	8	9
	Red	Leaf numbers	6	4	5	6	7	6	4	5	4
		Leaf width(cm)	2.6	1.8	2.3	2	2.6	2.7	2	1.6	2.1
		Leaf length(cm)	3.2	2.8	3.1	3	3.6	3.8	3.4	2.5	3.4
		Stem diameter(mm)	2.49	2.69	2.22	2.45	2.48	2.59	2.52	2.08	2.19
		Stem length(cm)	7.5	6.2	4.5	5.3	5.6	5.5	5.7	6.2	6.5
		Root numbers	5	4	4	4	4	4	3	5	3
		Root length(cm)	5.7	7.1	7.2	6.9	7.7	5.6	5.6	5.7	7.3
		Fresh weight (g)	1.49	1.13	1.28	1.2	1.26	1.55	1.8	1.64	1.48
		Dry weight(g)	0.18	0.15	0.12	0.15	0.18	0.11	0.2	0.15	0.21
	Blue	Leaf numbers	6	6	7	6	5	6	6	6	5
		Leaf width(cm)	2.2	2.5	2.1	2.6	2.2	2	2.5	2.7	2.3
		Leaf length(cm)	3.3	3.5	2.6	3.2	3.5	2.8	3.3	4.1	3.4
		Stem diameter(mm)	2.61	2.33	2.44	3.62	2.9	2.81	2.47	2.81	2.17
		Stem length(cm)	6.9	6.2	5.4	6.2	5.8	7.2	8.8	6.7	5.6
		Root numbers	3	4	4	4	4	4	5	4	5
		Root length(cm)	5.3	6.6	8.3	5.3	6.5	6.9	5.5	5.7	7.8
		Fresh weight (g)	1.7	1.54	1.66	1.67	1.56	1.35	1.43	1.68	1.6
		Dry weight(g)	0.21	0.2	0.2	0.19	0.23	0.21	0.22	0.14	0.2
	Yellow	Leaf numbers	4	5	5	6	4	6	4	6	5
		Leaf width(cm)	1.9	1.8	2.6	2	2.5	2	2.8	2.6	2.1
		Leaf length(cm)	2.6	2.8	3.5	2.8	4	2.8	4.3	4.1	3
		Stem diameter(mm)	2.48	2.6	2.25	3.02	1.99	2.4	2.03	2.52	2.89
		Stem length(cm)	7.1	6.7	7.2	5	5.3	5.2	5.1	6.3	5.8
		Root numbers	3	4	3	4	4	4	3	3	3
		Root length(cm)	6.9	7.7	6.5	6.5	6.6	6.3	6.6	5.8	5.9
		Fresh weight (g)	1.38	1.71	1.18	1.64	1.2	1.24	1.18	1.66	1.7
		Dry weight(g)	0.14	0.23	0.18	0.2	0.15	0.2	0.21	0.15	0.17
	Green	Leaf numbers	5	6	4	5	5	5	5	6	5
		Leaf width(cm)	2.3	2.5	2.3	2.1	2.7	2.1	2.2	2.3	1.8
		Leaf length(cm)	3.5	3.8	3.5	3.1	3.6	3.1	3.2	3.1	3.1
		Stem diameter(mm)	2.34	2.41	2.17	2.67	2.17	2.18	2.02	2.47	2.38
		Stem length(cm)	5.8	6.3	6.2	5.7	5.3	6.1	6.3	6.2	6.2
		Root numbers	4	3	4	4	3	3	3	4	3
		Root length(cm)	5.5	6.2	5.2	7.1	6	6.3	5.9	5.9	6.4
		Fresh weight (g)	1.28	0.99	1.32	1	1.26	1.36	1.6	1.48	1.31
		Dry weight(g)	0.2	0.18	0.17	0.11	0.13	0.15	0.15	0.16	0.12
	White	Leaf numbers	6	4	6	6	5	5	5	5	6
		Leaf width(cm)	2.1	2.2	2.4	1.9	2.1	2.1	2.3	1.8	2.2
		Leaf length(cm)	3.1	3.1	3.2	3	3.4	3.1	3.5	2.9	3.2
		Stem diameter(mm)	2.28	2.14	2.53	2.52	2.2	2.4	2.21	2.17	2.37
		Stem length(cm)	5.6	6.2	6.6	6.1	6.3	5.5	5.8	5.1	5.3
		Root numbers	4	3	4	3	5	4	5	4	5
		Root length(cm)	5.9	5.8	6.8	4.7	7.4	5.6	5.4	7.9	4.4
		Fresh weight (g)	1.27	1.39	1.14	1.52	1.33	1.57	1.38	1.55	1.5
		Dry weight(g)	0.15	0.17	0.12	0.15	0.18	0.15	0.18	0.19	0.13
	Control	Leaf numbers	5	4	5	5	5	5	5	5	6
		Leaf width(cm)	2.5	2.5	2.4	2.3	2.6	2.3	2.1	2.4	2.4
		Leaf length(cm)	3.8	3.6	3.5	3.6	3.6	3.2	2.8	3.4	3.6
		Stem diameter(mm)	2.33	2.39	2.51	2.49	2.45	2.5	2.23	2.37	2.15
		Stem length(cm)	7.3	6.8	5.7	5.6	5.6	5.5	6.5	4.8	6.3
		Root numbers	2	4	2	4	4	3	4	4	4
		Root length(cm)	4.6	6.4	4.8	5.2	6.3	4.6	6.7	4.8	4.9
		Fresh weight (g)	1.39	1.33	1.4	1.37	1.29	1.25	1.38	1.5	1.22
		Dry weight(g)	0.16	0.15	0.13	0.16	0.15	0.13	0.18	0.19	0.13
	Photosynthetic Pigment Contents
			Chl a	Chl b	Chl a+b		（mg/g.FW）
	Red	1	0.598376	0.334515	0.932891
		2	0.554711	0.341415	0.896126
		3	0.357388	0.18609	0.543478
	Blue	1	0.74602	0.32376	1.06978
		2	0.878374	0.411765	1.29014
		3	0.821405	0.37494	1.19634
	Yellow	1	0.819875	0.42378	1.24365
		2	0.467719	0.234945	0.702664
		3	0.658571	0.310935	0.969506
	Green	1	0.696335	0.3525	1.04883
		2	0.81548	0.41808	1.23356
		3	0.842496	0.401235	1.24373
	White	1	0.837146	0.377355	1.2145
		2	0.69366	0.34056	1.03422
		3	0.760279	0.385665	1.14594
	Control	1	0.609496	0.364275	0.973771
		2	0.563766	0.383835	0.947601
		3	0.606642	0.39603	1.00267
	Chlorophyll fluorescence
			Yield	qP	qN
	Red	1	0.269	0.948	0.905
		2	0.41	0.667	0.618
		3	0.258	0.556	0.791
		4	0.322	0.89	0.864
		5	0.38	0.503	0.261
		6	0.305	0.549	0.699
	Blue	1	0.539	0.926	0.666
		2	0.641	0.824	0.165
		3	0.57	1.033	0.705
		4	0.568	0.945	0.639
		5	0.502	0.795	0.589
		6	0.519	0.801	0.559
	Yellow	1	0.694	0.915	0.246
		2	0.606	0.826	0.339
		3	0.706	0.948	0.304
		4	0.608	0.833	0.354
		5	0.494	0.653	0.257
		6	0.611	0.859	0.412
	Green	1	0.515	0.88	0.661
		2	0.615	0.881	0.448
		3	0.373	0.869	0.82
		4	0.128	0.25	0.748
		5	0.276	0.493	0.695
		6	0.363	0.668	0.714
	White	1	0.25	0	1.002
		2	0.257	0.675	0.852
		3	0.445	0.807	0.705
		4	0.319	1.56	0.938
		5	0.51	0.758	0.509
		6	0.287	0.975	0.9
	Control	1	0.542	0.736	0.332
		2	0.284	0.691	0.832
		3	0.504	0.725	0.453
		4	0.363	0.532	0.483
		5	0.476	0.668	0.406
		6	0.623	0.798	0.15
	Stomatal observation			(area=length*width*π*¼				)		(stomatal density=number/field/field area)
	Red				Blue				Yellow				Green				White				Control
	length(μm)	width(μm)	length*width	number/field	length(μm)	width(μm)	length*width	number/field	length(μm)	width(μm)	length*width	number/field	length(μm)	width(μm)	length*width	number/field	length(μm)	width(μm)	length*width	number/field	length(μm)	width(μm)	length*width	number/field
	41.51	28.3	1174.73	11	43.7	27.84	1216.61	10	43.37	30.24	1311.51	11	47.46	25.54	1562.38	8	43.97	30.86	1356.91	7	41.47	28.43	1178.99	11
	42.26	26.54	1121.58	9	44.43	32.27	1433.76	10	40.57	24.49	993.559	11	40.61	27.3	1186.62	7	44.25	28.18	1246.96	7	44.06	25.23	1111.63	9
	40.44	31.55	1275.88	10	46.61	30.24	1409.49	11	44.62	30.34	1353.77	12	45.64	32.92	1075.73	8	45.25	33.64	1522.21	7	42.19	27.94	1178.79	8
	41.05	28.26	1160.07	7	42.18	30.84	1300.83	8	42.39	29.7	1258.98	14	48.27	29.22	1457.75	9	46.83	27.27	1277.05	8	44.63	30.29	1351.84	7
	46.81	29.49	1380.43	9	47.2	31.49	1486.33	9	43.56	25.22	1098.58	13	39.62	23.57	1151.36	8	44.85	31.61	1417.71	9	47.09	27.96	1316.64	10
	49.41	29.65	1465.01	9	39.82	29.22	1163.54	10	43.01	25.27	1086.86	12	40.22	30.2	1252.85	12	39.08	31.39	1226.72	10	47.46	31.5	1494.99	9
	45.24	30.73	1390.23	8	42.01	30.24	1270.38	12	48.01	27.87	1338.04	12	36.24	29.06	1016.53	12	45.68	30.28	1383.19	8	44.43	28.67	1273.81	8
	50.52	30.25	1528.23	7	34.54	29.71	1026.18	10	43.8	28.14	1232.53	8	40.55	31.15	1206.36	11	44.35	29.83	1322.96	10	44.17	29.27	1292.86	8
	46.67	32.84	1532.64	7	39.09	27.53	1076.15	11	40.08	26.47	1060.92	9	37.09	28.05	1040.37	11	44.08	29.19	1286.7	8	43.31	26.47	1146.42	7
	47.83	34.84	1666.4	8	46.49	33.75	1569.04	7	36.71	27.18	997.778	10	43.62	29.75	1297.69	10	43.39	31.24	1355.5	9	41.3	34.82	1438.07	9
	Root vitality
			mg/g/h
		Red	0.28137
			0.4257
			0.27948
		Blue	0.3579
			0.3435
			0.35
		Yellow	0.5973
			0.4935
			0.5004
		Green	0.4422
			0.4803
			0.46
		White	0.3954
			0.4281
			0.3984
		Control	0.3552
			0.5217
			0.3561
	Soluble protein
			mg/g.FW
		Red	2.5164
			2.8312
			3.1536
		Blue	1.9816
			2.4196
			2.4952
		Yellow	2.5472
			2.7268
			2.6156
		Green	2.734
			3.2256
			3.442
		White	2.7096
			2.8912
			2.548
		Control	3.2028
			2.7064
			3.2316
	Sugars
		Soluble sugar	Reducing sugar	Polysaccharide	mg/g.FW	()
	Red	28.97	5.53333	23.4367
		29.76	5.41167	24.3483
		32.82	5.90667	26.9133
	Blue	29.005	5.32833	23.6767
		26.215	4.92333	21.2917
		26.925	5.27	21.655
	Yellow	29.93	5.27333	24.6567
		31.34	5.32833	26.0117
		36.255	5.52167	30.7333
	Green	28.435	5.47167	22.9633
		26.635	4.70833	21.9267
		29.215	4.92667	24.2883
	White	19.515	3.98167	15.5333
		19.29	4.06	15.23
		22.775	4.39	18.385
	Control	22.23	5.97	16.26
		29.43	5.23833	24.1917
		29.625	5.42333	24.2017
	total flavonoids
		mg/g.FW
	Red	1.6155
		1.7585
		1.8335
	Blue	1.981
		1.923
		1.9465
	Yellow	1.6745
		1.548
		1.534
	Green	1.6945
		1.743
		1.7125
	White	1.684
		1.4015
		1.582
	Control	1.371
		1.765
		1.5775
	Total polyphenols
		mg/g.FW
	Red	4.87
		4.095
		4.1625
	Blue	4.9425
		4.50375
		4.8525
	Yellow	3.54125
		3.47875
		3.545
	Green	3.86
		2.77625
		3.2525
	White	3.825
		3.61125
		4.9325
	Control	3.56
		3.725
		3.805
